# Supplementary material
Source: MDPI journal article supplement (https://www.mdpi.com/2673-8112/3/5/53)
Supplement: s1 [file s1]

**Supplementary file**

**Supplemental Table S1. Literature Summary Table**

| Study                 | Type of Study                              | Study Population                                                                               | Aim                                                                                                                                                              | Summary Points                                                                                                                                                                                                                                                                 |
|-----------------------|--------------------------------------------|------------------------------------------------------------------------------------------------|------------------------------------------------------------------------------------------------------------------------------------------------------------------|--------------------------------------------------------------------------------------------------------------------------------------------------------------------------------------------------------------------------------------------------------------------------------|
| Xie <sup>15</sup>     | Retrospective study                        | 153760 patients with COVID -19<br>5637647 contemporary controls<br>5859411 historical controls | To estimate the risks and 12- month burden of pre-specified incident cardiovascular outcomes                                                                     | Increased risk of single and composite outcomes in patients with COVID – 19: cerebrovascular disorders<br>arrhythmias; inflammatory heart disease; ischemic heart; other cardiac disorders; thrombotic disorders; MACE (all-cause mortality, stroke and myocardial infarction) |
| Basso <sup>17</sup>   | Retrospective multicenter study            | 21 cardiac tissues from autopsies of consecutive COVID – 19 patients                           | To assess the pathological spectrum of cardiac involvement in COVID – 19<br>To determine the frequency and type of myocarditis and other forms of cardiac injury | Myocarditis: 3 cases<br>Increased interstitial macrophage infiltration in the myocardium: 18 cases<br>Mild pericarditis: 4 cases                                                                                                                                               |
| Blagova <sup>21</sup> | Retrospective study                        | 14 patients with biopsy proven post- COVID-19 myocarditis                                      | To study the clinical signs and mechanism of myoendocarditis in the long-term period after COVID -19                                                             | Increased anti-heart antibodies in 92.9 % of the patients<br>Acute lymphocytic myocarditis – 12 patients<br>Eosinophilic myocarditis – 2 patients<br>Endocarditis – 3 patients                                                                                                 |
| Bauer <sup>26</sup>   | Cross-sectional, single-center pilot study | 30 healthy male elite athletes                                                                 | To assess the effect of COVID- 19 on systemic arterial stiffness without impairment of cardiovascular function                                                   | Significant vascular alterations: increase in Aix and Aix@75, significant effects of time on peripheral and aortic blood pressure values                                                                                                                                       |
| Boehmer <sup>33</sup> | Retrospective study                        | 3605294 patients, among whom 1452773 COVID -19 patients                                        | To assess the association between COVID – 19 and myocarditis                                                                                                     | The occurrence of myocarditis was 42% higher in 2020 than in 2019<br><br>The risk of myocarditis in COVID -19 patients was 16 times higher than in non – COVID -19 patients                                                                                                    |

|                         |                                                |                                                                       |                                                                                                                                                                     |                                                                                                                                                                                          |
|-------------------------|------------------------------------------------|-----------------------------------------------------------------------|---------------------------------------------------------------------------------------------------------------------------------------------------------------------|------------------------------------------------------------------------------------------------------------------------------------------------------------------------------------------|
|                         |                                                |                                                                       |                                                                                                                                                                     | 40% of the patients with myocarditis had a history of COVID -19                                                                                                                          |
| Ammirati <sup>35</sup>  | Retrospective observational multicentric study | 112 patients with suspected acute myocarditis                         | To report the prevalence, baseline characteristics, in -hospital management and outcomes for patients with COVID -19 associated acute myocarditis                   | Acute myocarditis: 2.4 to 4.1 per 1000 COVID -19 hospitalizations                                                                                                                        |
| Vidula <sup>36</sup>    | Retrospective multicenter study                | 1047 patients with COVID -19 who underwent CMR                        | To characterize myocardial injury in COVID -19 patients                                                                                                             | Nonischaemic injury: 20.9%<br>Acute myocarditis: 7.9%<br>Nonacute/nonischaemic: 13%                                                                                                      |
| Daniels <sup>37</sup>   | Observational study                            | 1597 US competitive athletes with CMR screening after COVID -19       | To determine the prevalence of myocarditis in athletes with COVID -19 and compare screening strategies for safe return to play                                      | Myocarditis: 37 athletes (2.3%)<br><br>CMR yielded a 7.4 – fold increase in the detection of myocarditis<br><br>Follow -up CMR: resolution of T2 elevation in all and LGE in 11 athletes |
| Martinez <sup>38</sup>  | Cross – sectional study                        | 789 professional athletes, among whom 460 had COVID -19               | To determine the prevalence of abnormal return – to- play test results potentially associated with cardiac injury post – COVID 19 and results of additional testing | Abnormal screening results: 30 athletes<br><br>CMR: 5 athletes<br><br>No adverse cardiac events in athletes who resumed sport                                                            |
| Starekova <sup>39</sup> | Retrospective study                            | 145 competitive athletes recovering from COVID – 19 who underwent CMR | To describe the prevalence and severity of CMR findings of myocarditis                                                                                              | CMR findings consistent of myocarditis: 2 patients<br><br>Marked nonischemic LGE and T2 weighted abnormalities: 1 patient                                                                |
| Rajpal <sup>40</sup>    | Prospective study                              | 26 competitive college athletes with COVID- 19 who underwent CMR      | To investigate the use of CMR to detect myocardial inflammation and identify high – risk athletes for return to competitive play                                    | CMR findings suggestive of myocarditis: 4 athletes<br><br>LGE without T2-elevation: 8 athletes                                                                                           |

|                          |                                               |                                                                                                                                                                                                    |                                                                                                                           |                                                                                                                                                                                                                                                                                                                                                          |
|--------------------------|-----------------------------------------------|----------------------------------------------------------------------------------------------------------------------------------------------------------------------------------------------------|---------------------------------------------------------------------------------------------------------------------------|----------------------------------------------------------------------------------------------------------------------------------------------------------------------------------------------------------------------------------------------------------------------------------------------------------------------------------------------------------|
| Clark <sup>41</sup>      | Retrospective study                           | 59 COVID- 19 positive athletes who underwent cardiovascular screening protocol<br>60 athletic controls<br>27 healthy controls                                                                      | To evaluate the prevalence and extent of cardiovascular pathology in COVID- 19 positive athletes                          | Myocarditis: 2 COVID -19 positive athletes, among whom 1 developed left ventricle dysfunction<br><br>Other disparities between athletes and healthy controls may represent only remodeling from athletic training                                                                                                                                        |
| Artico <sup>42</sup>     | Prospective, multicenter, observational study | 342 patients with COVID – 19 and elevated troponin level<br>Two control groups : 64 COVID - 19 patients with normal troponin levels and 113 patients without COVID -19 or elevated troponin levels | To assess the presence, nature and extend of myocardial damage in COVID -19 hospitalized patients with troponin elevation | The frequency of any heart abnormality (left or right ventricular impairment, scar or pericardial disease): 2-fold greater in cases compared to controls: 61% vs 31 %<br><br>Cases were more likely than controls to have infarction: 13% vs 2% and 7%<br><br>Probable recent myocarditis: 6.7% in cases compared to 1.7% in controls without COVID - 19 |
| Linschoten <sup>47</sup> | International patient registry                | 3011 hospitalized COVID -19 patients                                                                                                                                                               | To determine the frequency and pattern of cardiac complications in patients hospitalized with COVID -19                   | In- hospital mortality: 19.8%, among which 2.7% cardiac causes<br><br>Cardiac complications: 11.6 % patients                                                                                                                                                                                                                                             |
| Brito <sup>49</sup>      | Cross – sectional observational study         | 54 consecutive student athletes COVID – 19 positive who underwent echocardiography and CMR (48 subjects)                                                                                           | To explore the spectrum of cardiac abnormalities in student athletes with uncomplicated COVID- 19                         | Pericardial late enhancements and pericardial effusion: 39.5% athletes, among whom 12.5% had reduced GLS and/or increased T1                                                                                                                                                                                                                             |
| Puntmann <sup>50</sup>   | Prospective observational study               | 100 patients who recently recovered from COVID -19                                                                                                                                                 | To evaluate the presence of myocardial injury in unselected patients recently recovered from COVID -19                    | Cardiac involvement in 78 patients on CMR<br><br>Ongoing myocardial inflammation: 60 patients                                                                                                                                                                                                                                                            |

|                         |                                          |                                                                                                 |                                                                                                                                                                    |                                                                                                                                                                                                                                                                                                                                                                                          |
|-------------------------|------------------------------------------|-------------------------------------------------------------------------------------------------|--------------------------------------------------------------------------------------------------------------------------------------------------------------------|------------------------------------------------------------------------------------------------------------------------------------------------------------------------------------------------------------------------------------------------------------------------------------------------------------------------------------------------------------------------------------------|
| KT <sup>60</sup>        | Prospective multicenter registry         | 144 STEMI and 121 NSTEMI patients with COVID -19<br>Controls : national pre- Covid -19 database | To report the demographics, angiographic findings and in- hospital outcomes of COVID- 19 ACS patients and compare them with pre- COVID -19 cohorts                 | <p>Symptom -to – admission times: significantly prolonged in COVID – ACS patients compared to pre – COVID cohorts (STEMI 339 min vs 173 min; NSTEMI 417 min vs 295 min)</p> <p>Mortality in COVID – ACS patients was significantly higher than in pre- COVID cohorts (STEMI 22.9% vs 5.7%, NSTEMI 6.6% vs 1.2%)</p> <p>Cardiogenic shock: 20.1% in COVID – STEMI vs 8.7% in controls</p> |
| Acharya <sup>61</sup>   | Multicenter Registry AHA – COVID -19 CVD | 8920 patients hospitalized with COVID -19                                                       | To examine the incidence of IHCA in hospitalized patients with COVID 19                                                                                            | <p>IHCA: 5.9% patients – non- shockable rhythm 76.5%</p> <p>Independent predictors of IHCA: older age, Hispanic ethnicity, non – Hispanic black race, oxygen use at admission, quick Sequential Organ Failure Assessment score on admission, hypertension</p> <p>6.9% patients with IHCA survived to discharge</p>                                                                       |
| Sultanian <sup>63</sup> | Observational registry                   | 1946 cases of OHCA and 1080 cases of IHCA between 1 January to 20 July 2020                     | To evaluate the characteristics and outcome among cardiac arrest cases with COVID -19 and differences between pre-pandemic and pandemic period in OHCA and IHCA    | <p>COVID -19 was involved in 10% of all OHCA and 16% of IHCA</p> <p>In COVID -19 cases, 30 – day mortality was increased 3.4 – fold in OHCA and 2.3 – fold in IHCA</p>                                                                                                                                                                                                                   |
| Bilaloglu <sup>65</sup> | Retrospective multicenter study          | 3334 hospitalized COVID -19 patients                                                            | To assess the incidence and risk factors for venous and arterial thrombotic events in patients hospitalized with COVID 19                                          | <p>Any thrombotic event: 16% of patients 6.2% venous, 11.1% arterial</p> <p>All – cause mortality was 24.65% in those with thrombotic events</p>                                                                                                                                                                                                                                         |
| Cosyns <sup>71</sup>    | Retrospective study                      | 117 IE cases                                                                                    | To compare the number of cases of IE between January 24, 2020 and April 30, 2020 with the number of cases of IE during the same time frame in 2019 and the rate of | The percentage of diagnosed IE decreased by 33% during the COVID -19 pandemic                                                                                                                                                                                                                                                                                                            |

|                          |                                             |                                                                                                                                          |                                                                                                                                                                              |                                                                                                                                                                                                                           |
|--------------------------|---------------------------------------------|------------------------------------------------------------------------------------------------------------------------------------------|------------------------------------------------------------------------------------------------------------------------------------------------------------------------------|---------------------------------------------------------------------------------------------------------------------------------------------------------------------------------------------------------------------------|
|                          |                                             |                                                                                                                                          | in – hospital complications and mortality between the 2 periods                                                                                                              | Cerebral embolism rate: 18% in 2019 vs 56% in 2020<br><br>In – hospital IE mortality: 21% in 2019 vs 61 % in 2020                                                                                                         |
| Bhatla <sup>73</sup>     | Retrospective study                         | 700 patients hospitalized with COVID -19                                                                                                 | To evaluate the risk of cardiac arrest and arrhythmias in patients hospitalized with COVID -19                                                                               | Cardiac arrest: 9 patients<br>AF: 25 patients<br>Bradyarrhythmia: 9 patients<br>NSVT: 10 patients<br>Only cardiac arrest was associated with in – hospital mortality                                                      |
| Wollborn <sup>75</sup>   | Retrospective study                         | 111 529 patients : 3090 COVID – 19 positive patients matched with 11004 patients COVID – 19 negative and with 5005 pre-pandemic patients | To assess the odds of in – hospital AF in COVID – 19 patients compared to COVID - 19 negative patients and pre-pandemic patients                                             | COVID -19 positive patients had 1.19 times higher odds to develop AF compared to COVID – 19 negative patients and 1.57 times higher odds compared to pre-pandemic patients                                                |
| Rosenblatt <sup>76</sup> | Multicenter Registry<br>AHA – COVID -19 CVD | 30 999 patients hospitalized with COVID -19                                                                                              | To evaluate the incidence and outcomes associated with new-onset AF in hospitalized COVID – 19 patients                                                                      | New – onset AF: 5.4%<br><br>New – onset AF was associated with higher rates of MACE (23.8% VS 6.5%)                                                                                                                       |
| Mercuro <sup>78</sup>    | Retrospective, observational study          | 90 COVID -19 patients receiving hydroxychloroquine                                                                                       | To characterize the risk and degree of QT prolongation in patients with COVID- 19 in association with the use of hydroxychloroquine with or without concomitant azithromycin | Patients receiving hydroxychloroquine were at higher risk of QTc prolongation, concomitant azithromycin was associated with greater changes in QTc                                                                        |
| Luchian <sup>81</sup>    | Prospective study                           | 310 COVID -19 hospitalized patients                                                                                                      | To investigate the presence of subclinical cardiac dysfunction in recovered COVID -19 patients without known cardiopulmonary disease                                         | Persistent dyspnea one- year after COVID- 19 was present in 34.8% of the patients<br><br>GCW and GWI were echocardiographic parameters independently associated with symptoms                                             |
| Havervall <sup>84</sup>  | Prospective study                           | 2149 health care professionals among whom 393 COVID -19 positive                                                                         | To investigate COVID -19 – related long – term symptoms in health care professionals                                                                                         | COVID – 19 positive participants vs COVID - 19 participants had at least 1 moderate to severe symptom lasting $\geq$ 2 months (26% vs 9%) and 15% vs 3% had at least 1 moderate to severe symptom lasting $\geq$ 8 months |

|                                 |                                   |                                                                                   |                                                                                                                                                                                                                 |                                                                                                                                                                                                                                                                                                                                                    |
|---------------------------------|-----------------------------------|-----------------------------------------------------------------------------------|-----------------------------------------------------------------------------------------------------------------------------------------------------------------------------------------------------------------|----------------------------------------------------------------------------------------------------------------------------------------------------------------------------------------------------------------------------------------------------------------------------------------------------------------------------------------------------|
| Salah <sup>85</sup>             | Retrospective study               | 587330 patients with/without COVID -19/history of HF                              | To evaluate the association between COVID- 19 recovery and incident HF                                                                                                                                          | COVID -19 hospitalization was associated with a 45% higher hazard of incident HF                                                                                                                                                                                                                                                                   |
| Urmeneta Ulloa <sup>86</sup>    | Prospective study                 | 57 post- COVID 19 patients and 20 healthy controls who underwent CMR              | To detect possible oedema/diffuse fibrosis using CMR                                                                                                                                                            | Post -COVID -19 patients compared to healthy controls had raised T2 values but similar native T1, FT- CS and FT – RS were lower in post – COVID -19 patients undergoing CMR after < 8 weeks compared to ≥ 8 weeks                                                                                                                                  |
| Puntmann <sup>87</sup>          | Prospective observational cohort  | 346 post -COVID – 19 patients who underwent CMR<br>90 controls without COVID – 19 | To assess potential differences in imaging and biomarker parameters between individuals with lingering cardiac symptoms post COVID-19 compared to those without symptoms or controls without previous infection | Symptomatic COVID -19 patients had higher heart rates and higher imaging values or contrast agent accumulation<br><br>Diffuse myocardial oedema was more significant in patients who remained symptomatic at follow -up                                                                                                                            |
| Raisi – Estabragh <sup>88</sup> | Retrospective study – UK Biobank  | 17 871 COVID 19 cases                                                             | To examine the association between COVID- 19 and incident cardiovascular events                                                                                                                                 | Non – hospitalized patients: higher risk of incident VTE and death<br><br>Primary COVID – 19 hospitalization: increased risk of all outcomes (myocardial infarction, stroke, HF, AF, VTE, pericarditis, all – cause death, cardiovascular death)<br><br>COVID -19 as secondary hospitalization diagnosis: similarly increased risk of all outcomes |
| Lau <sup>92</sup>               | Prospective cross-sectional study | 15 consecutive patients with resting HR ≥ 90 bpm                                  | To identify possible causes for tachycardia in patients recovering from COVID -19                                                                                                                               | Symptomatology was attributed to deconditioning and anxiety                                                                                                                                                                                                                                                                                        |
| Huang <sup>94</sup>             | Ambidirectional study             | 1733 discharged COVID -19 patients                                                | To describe the long – term health consequences of patients with COVID -19 and investigate the associated risk factors                                                                                          | 6 months post – acute COVID -19 infection, the most common symptoms were fatigue, muscle weakness, sleep difficulties, anxiety or depression                                                                                                                                                                                                       |

|                     |                                 |                                      |                                                                                                                                                                                            |                                                                                                                                                           |
|---------------------|---------------------------------|--------------------------------------|--------------------------------------------------------------------------------------------------------------------------------------------------------------------------------------------|-----------------------------------------------------------------------------------------------------------------------------------------------------------|
|                     |                                 |                                      |                                                                                                                                                                                            | Patients more severely ill during hospitalization had more severe pulmonary dysfunction and abnormal chest imaging                                        |
| Kedor <sup>95</sup> | Prospective observational study | 42 post- COVID -19 syndrome patients | To analyze clinical and laboratory parameters in patients with post- COVID -19 syndrome with persistent moderate to severe fatigue and exertion intolerance 6 months post- acute infection | Patients with mild- COVID -19 develop a chronic syndrome, hand grip strength was associated with biomarkers which indicate hypoperfusion and inflammation |

\*superscript: number of reference cited in the manuscript; Abbreviations: ACS = acute coronary syndrome, AF = atrial fibrillation, COVID -19 = coronavirus disease 2019, CMR = cardiac magnetic resonance, FT – CS = feature tracking circumferential strain, FT – RS = feature tracking radial strain, GCW = global constructive work, GWI = global work index, GLS = global longitudinal strain, HF = heart failure, HR = heart rate IE = infective endocarditis, IHCA = in – hospital cardiac arrest, LGE = late gadolinium enhancement, MACE = major adverse cardiovascular events, NSTEMI = non ST- elevation myocardial infarction, NSVT = non – sustained ventricular tachycardia, OHCA = out – of – hospital cardiac arrest, STEMI = ST – elevation myocardial infarction, VTE = venous thromboembolism
